## Chromatin dynamics during hematopoiesis reveal discrete regulatory modules instructing differentiation

Grigorios Georgolopoulos<sup>1,2,\*†</sup>, Nikoletta Psatha<sup>1,\*</sup>, Mineo Iwata<sup>1</sup>, Andrew Nishida<sup>1</sup>, Tannishtha Som<sup>1</sup>, Minas Yiangou<sup>2</sup>, John A. Stamatoyannopoulos<sup>1,3,4</sup>, Jeff Vierstra<sup>1</sup>

<sup>1</sup> Altius Institute for Biomedical Sciences, Seattle, WA, USA

<sup>2</sup> Department of Genetics, Development & Molecular Biology, School of Biology, Aristotle University of Thessaloniki, Thessaloniki, Greece

<sup>3</sup> Department of Genome Sciences, University of Washington, Seattle, Washington, USA

<sup>4</sup> Division of Oncology, Department of Medicine, University of Washington, Seattle, Washington, USA

\* These authors contributed equally

† Current address: Department of Development and Regeneration, KU Leuven, Leuven, Belgium

Correspondences to: [jvierstra@altius.org](mailto:jvierstra@altius.org) and/or [ggeorgol@altius.org](mailto:ggeorgol@altius.org)

### Abstract

Lineage commitment and differentiation is driven by the concerted action of master transcriptional regulators at their target chromatin sites. Multiple efforts have characterized the key transcription factors (TFs) that determine the various hematopoietic lineages. However, the temporal interactions between individual TFs and their chromatin targets during differentiation and how these interactions dictate lineage commitment remains poorly understood. We performed dense, daily, temporal profiling of chromatin accessibility (DNase I-seq) and gene expression changes (total RNA-seq) along *ex vivo* human erythropoiesis to comprehensively define developmentally regulated DNase I hypersensitive sites (DHSs) and transcripts. We link both distal DHSs to their target gene promoters and individual TFs to their target DHSs, revealing that the regulatory landscape is organized in distinct sequential regulatory modules that regulate lineage restriction and maturation. Finally, direct comparison of transcriptional dynamics (bulk and single-cell) and lineage potential between erythropoiesis and megakaryopoiesis uncovers differential fate commitment dynamics between the two lineages as they exit pluripotency. Collectively, these data provide novel insights into the global regulatory landscape during hematopoiesis.

## 1 Introduction

2 The temporal activation of stage-specific regulatory DNA instructs lineage specific gene expression  
3 programs that underpin cellular fate and potential. The establishment and maintenance of regulatory DNA  
4 is mediated by the combinatorial engagement of sequence-specific transcription factors (TFs) that bind in  
5 the place of a canonical nucleosome. Over the course of cellular differentiation programmed shifts in the  
6 global transcription factor milieu drive extensive re-organization of chromatin<sup>1,2</sup>, where silencing of  
7 regulatory DNA associated with alternate lineage and the *de novo* activation of lineage-restricted  
8 elements result in the narrowing of the epigenetic and functional landscape<sup>3</sup>. However, it is unclear how  
9 and when regulatory DNA is dynamically activated and silenced during cell state transitions to establish  
10 lineage restricted gene expression programs and how these epigenetic changes relate to developmental  
11 potential.

12 Hematopoiesis is a prototypical system to study how genetically and epigenetically encoded programs are  
13 established during cellular differentiation<sup>4-6</sup>. Conventionally, hematopoiesis is depicted as a discrete  
14 hierarchical process where a multipotent hematopoietic stem and progenitor cell (HSPC) traverses a  
15 sequence of bifurcating decisions, mediated by the expression of lineage-specific TFs, with each decision  
16 resulting in an increasingly restricted fate potential. Historically, the characterization of the gene  
17 regulatory programs involved in the transition from HSPCs to terminal fates has relied on the  
18 identification of differential transcriptional programs from isolated discrete populations using defined cell  
19 surface markers<sup>7-10</sup>. While this approach has led to the identification of master regulatory transcription  
20 factors<sup>10,11</sup> that define many of the major hematopoietic cell lineages and has enabled a systematic  
21 mapping of their steady-state regulatory landscapes<sup>9,12</sup>, interrogation of discretely defined populations  
22 cannot elucidate the dynamic regulatory events that mark cell-state transitions.

23 Recently, single-cell chromatin and transcriptional profiling assays have attempted to resolve the spatio-  
24 temporal *cis*- and *trans*- dynamics in different stages of hematopoiesis<sup>13-16</sup>. These studies have largely  
25 relied on the analysis of either bulk or immunophenotypically isolated populations of steady-state  
26 peripheral blood or bone marrow derived cells, whereby hierarchical relationships and developmental  
27 trajectories between cell states are predicted computationally. While such experimental approaches have  
28 aided in defining major subpopulations of hematopoietic cells and their respective epigenetic and  
29 transcriptional landscapes, definition of developmental trajectories within individual lineages from  
30 population snapshots is challenging due to the limited sensitivity and the resulting technical and analytical  
31 artifacts associated with single-cell genomic assays<sup>17,18</sup>. Additionally, because developmental trajectories  
32 are predicted *in silico*, direct association of functional changes (i.e., lineage potential) to intermediate  
33 cellular states is not possible<sup>19</sup>.

34 In order to investigate the dynamics of regulatory and functional events during differentiation, we use  
35 human erythropoiesis as a proxy for hematopoietic development. The transition from HSPCs to  
36 terminally differentiated enucleated red blood cells involves a series of morphologically, functionally, and  
37 phenotypically distinguishable states. Multiple efforts relying on the isolation of these states have  
38 exhaustively characterized key transcriptional regulators<sup>20,21</sup> and chromatin elements implicated in  
39 erythropoiesis<sup>9,22</sup>. However, a general understanding of the temporal interplay between individual *cis*- and  
40 *trans*- elements and how these establish stage-specific transcriptional programs and lineage commitment  
41 during hematopoiesis remains rudimentary. Furthermore, because erythrocytes share their developmental  
42 origins of with other myeloid lineages (granulocytic/monocytic and megakaryocytic), erythropoiesis  
43 represents an ideal system to study how lineage choice is genetically and epigenetically encoded.

44 Here, we capitalize on the *ex vivo* human differentiation scheme where dense unbiased sampling of the  
45 populations captures the dynamics of chromatin accessibility and gene expression during differentiation  
46 with a completely defined developmental trajectory. DNase I-seq and gene expression profiling (bulk and  
47 single cell) time-course during erythropoiesis coupled with lineage potential assays and morphological  
48 characterization, enabled the assignment of distal elements (alone or in combination) to target genes and



49 individual TFs to their target DHSs which collectively comprise discrete regulatory modules associated  
50 with lineage potential. Comparing the activity patterns of the TF regulatory modules in the erythroid  
51 lineage to the closely related megakaryocytic lineage, provides insights into how these modules instruct  
52 lineage commitment. Collectively, our findings provide key insights into the organization of the  
53 functional epigenetic landscape during hematopoietic differentiation and its relation to lineage-potential.

#### 54 **Dense mapping of the temporal dynamics of *cis*- and *trans*- elements during erythropoiesis**

55 Human erythropoiesis was induced *ex vivo* for 12 days using an established differentiation protocol<sup>23</sup> that  
56 faithfully recapitulates the major features of *in vivo* erythropoiesis. Starting from human adult-derived  
57 mobilized peripheral blood CD34<sup>+</sup>-enriched HSPCs from 3 healthy donors we cultured the cells in  
58 defined media for 12 days (**Figure 1a** and **Methods**). Characteristic features of developing erythroblast  
59 cells were confirmed by immunophenotyping using canonical cell-surface markers of early (CD117, C-  
60 Kit) and late (CD235a, Glycophorin A) erythropoiesis as well as morphologically by hematoxylin-eosin  
61 staining of cell smears (**Supplementary Figure 1**).

62 To densely map both chromatin accessibility and transcriptional dynamics during the transition from  
63 HSPCs to committed erythroblasts, we subsampled a single continuous culture each day (12 days) and  
64 performed DNase I-seq analysis and total RNA-seq (**Figure 1a,b**). Biological replicates from CD34<sup>+</sup>  
65 HSPCs from 3 donors were highly reproducible for both chromatin accessibility and gene expression  
66 profiles where the majority of the observed variability was accounted for by developmental trajectory  
67 (i.e., sampling days) (**Figure 1b,c** and **Supplementary Figure 2a**), as biological replicates were highly  
68 correlated (**Supplementary Figure 2b,c**). For many individual DHSs and genes, we observed  
69 quantitative changes in chromatin accessibility and expression over the course of differentiation  
70 highlighted by quantitative trajectories of opening or closing (**Figure 1d,e**). Notably, accessibility  
71 changes were mostly confined to compact regions of the genome (~200bp average DHS width). In many  
72 cases, we observed both opening and closing events within close proximity (**Figure 1d**), indicating focal  
73 regulation<sup>24</sup> of chromatin structure in contrast to previous reports that chromatin changes during  
74 differentiation occur over large domains<sup>1,25</sup>.

75 To systematically identify developmentally responsive *cis*-elements, we leveraged the observed  
76 continuity of DHS signal over adjacent days (**Figure 1d**) and modelled DNase I cleavage density against  
77 differentiation time-points (**Methods**). We determined significance by comparing our full model to a  
78 reduced model (intercept-only; not accounting for developmental time) and performing a likelihood ratio  
79 test (**Methods**). Of the total 79,085 DHSs accessible in 2 or more samples/replicates, we conservatively  
80 identified 11,805 (14.9%) significantly changing DHSs (adjusted  $p < 10^{-5}$  and fold-change  $> 2$ ), nearly  
81 evenly grouped between activated and silenced (45% and 55%, respectively) (Supplementary Table 1). A  
82 similar analytical approach applied to the RNA expression data identified 5,769 developmentally  
83 regulated genes (adjusted  $p < 10^{-5}$  and fold-change  $> 2$ ), of which 62% up-regulated and 38% down-  
84 regulated over the course of differentiation (**Supplementary Table 2**). Collectively, these data define a  
85 high-resolution and quantitative map of chromatin and gene expression dynamics during erythroid  
86 differentiation.

#### 87 **Stage-specific compartmentalization of the *cis*- and *trans*- landscape**

88 PCA indicated that days 5-6 were associated with a critical developmental inflection point during *ex vivo*  
89 differentiation (**Figure 1b,c**). We therefore sought to characterize the relationship between temporal  
90 chromatin and gene expression dynamics with regards to the observed immunophenotypic and  
91 morphological changes present in the population of differentiating cells. We performed unsupervised  
92 clustering (*K*-means;  $k=5$ ) on dynamically changing DHSs and developmentally responsive transcripts  
93 (**Figure 2a,b**). This analysis revealed a stark partitioning of activated and silenced genes and DHSs into  
94 non-overlapping sets that closely paralleled canonical developmental features of erythropoiesis.  
95 Particularly, DHSs rapidly silenced within the first days of differentiation (clusters E1 and E2) were  
96 found to preferentially harbor binding sequences utilized by the known HSPC regulators such as

97 (HOXA9<sup>26</sup>, RUNX<sup>27</sup> and ERG<sup>28</sup>) (**Supplementary Figure 3**). Similarly, immediately downregulated  
98 transcripts upon induction of differentiation (cluster G1) include these transcription factors as well as  
99 structural genes characteristic of CD34<sup>+</sup> HSPCs (**Figure 2b**). Consistent with PCA (**Figure 1b,c**), a rapid  
100 and marked turnover of chromatin and gene expression landscape is observed between days 5-7 where an  
101 early erythroid signature appears in both activated DHSs and gene expression, marked by the  
102 upregulation of *GATA1*, *KLF1*, *PPARA* and *TFRC* (cluster G4). Markers of mature erythropoiesis emerge  
103 later in the differentiation (after day 8; cluster G5) with the upregulation of hemoglobins, glycophorin A  
104 (*GYP A*) and *ALAS2* (**Figure 2b**). Beyond the temporal partitioning of developmentally regulated DHS  
105 and transcripts we observed topological segregation of co-regulated elements. Mapping changing DHS  
106 and genes to TADs called from CD34<sup>+</sup> HSPCs<sup>29</sup> and day 11 *ex vivo* differentiated erythroid progenitors<sup>30</sup>  
107 Hi-C data revealed enrichment of individual TADs for stage-specific elements (**Supplementary Figure**  
108 **3**). Additionally, this partitioning appears more contrasted in late erythroid TADs compared to CD34<sup>+</sup>,  
109 suggesting the establishment of a defined erythroid regulatory landscape.

110 In addition to canonical activation and downregulation patterns observed, we found a subset of genes  
111 exhibiting reproducible transient upregulation (clusters G2 and G3) occurring prior to establishment of  
112 the erythroid signature (**Figure 2b**). Transiently upregulated genes are found enriched in transcripts  
113 representing myeloid lineages including several myeloid markers (e.g. *MPO*, *KIT*) as well as the myeloid-  
114 specific transcription factor CEBPA. Compatible with gene expression, late closing DHSs in cluster E2  
115 and E3 were enriched in CEBPA recognition sequences (**Supplementary Figure 3**). Moreover, the  
116 majority (~80%) of DHSs in cluster E2 and E3 were found overlapping with DHSs active in other  
117 myeloid cell types (macrophages and monocytes) (**Supplementary Figure 5**), denoting a transient  
118 emergence of myeloid-related regulatory program prior to erythroid commitment.

119 Taken together these data describe the sequence of developmentally related changes in both the *cis*- and  
120 *trans*- environment as the regulatory landscape of the erythroid development traverses from a lineage-  
121 permissive program to a defined erythroid-specific signature. Expectedly, activated DHSs (clusters E4-  
122 E5) were found to preferentially harbor red blood cell-related GWAS variants (1.36-fold enrichment over  
123 all detected DHSs), highlighting their functional role in regulating erythropoiesis (**Supplementary**  
124 **Figure 6**).

### 125 **Connecting individual DHSs to genes**

126 The overall dynamics of chromatin accessibility for individual DHSs closely mirrored that of the  
127 expression of nearby genes. To formulate this, we performed an enrichment test to investigate the DHS  
128 landscape around a gene promoter. Interestingly, we found that developmentally regulated genes are  
129 enriched for DHSs with a similar developmental profile (**Figure 2c**). For example, early closing genes  
130 (cluster G1) are significantly enriched for cluster E1 DHSs. Noteworthy, transient genes of cluster G3 are  
131 harboring DHSs belonging to both late closing DHS cluster E3 and early activated erythroid DHS cluster  
132 E4, suggesting that the transient nature of these genes is a result of the combinatorial activity of a closing  
133 and an opening chromatin landscape.

134 Because of fine-resolution afforded by our dense sampling approach, we sought to quantify the extent of  
135 genome-wide coactivation patterns that could potentially comprise physical regulatory links between  
136 DHSs and their target genes by correlating the temporal expression patterns of a gene to nearby ( $\pm 1$  Mb  
137 from TSS) developmentally regulated DHSs given that the majority of transcriptional enhancers are  
138 located within this range from the target promoter<sup>31</sup>. This analysis identified 41,625 connections (absolute  
139 Pearson correlation coefficient  $r > 0.7$ ), with the vast majority of gene-DHS links occurring within 50  
140 kilobases of the transcription start site (**Figure 2d**). Overall, we connected 80.4% (4,640) of the  
141 developmentally regulated genes with  $\geq 1$  DHS and 86.8% (10,247) of changing DHSs were linked to  $\geq 1$   
142 developmentally regulated gene. While on average 93.6 DHSs reside within  $\pm 1$  Mb of a given gene, only  
143 9 DHSs ( $\pm 8$  SD) were found to be linked with a changing gene. This allowed us to identify *cis*-regulatory  
144 inputs at much higher resolution than typically afforded by standard chromatin conformation-based

145 methods<sup>32,33</sup>. Specifically, using previously published Hi-C data derived from *ex vivo* cultured erythroid  
146 progenitors we were able to predict chromatin loops only down to 70kb (**Supplementary Figure 7**). We  
147 therefore sought to functionally validate these associations by genetic perturbation of gene-DHS links.

148 We focused on the *cis*-elements predicted to regulate the expression *CDH1*. *CDH1* is a cell surface  
149 marker with expression restricted to erythropoiesis among the hematopoietic populations<sup>34</sup> and known to  
150 be implicated in erythroid development and maturation<sup>35,36</sup>. Specifically, we genetically disrupted two  
151 DHSs (HS1 and HS2) highly correlated with *CDH1* expression ( $r=0.939$  and  $0.976$ , respectively), situated  
152 upstream (5kb and 12kb, respectively) of the promoter of *CDH1* using TALE-nucleases<sup>37,38</sup> (**Figure 2e**  
153 and **Supplementary Figure 8**). Homozygous deletion of these DHSs as well as the promoter in the  
154 human derived erythroid progenitor cell line HUDEP-2 where these DHSs are also active, resulted in  
155 complete ablation of the *CDH1* expression as determined by flow-cytometry (**Figure 2f**). These results  
156 suggest that both elements as predicted by the correlation analysis as regulators of *CDH1*, indeed drive  
157 the expression of the gene and their deletion confers effects similar to the deletion of the gene promoter.

158 Overall, these findings suggest that the majority of changes in transcription during development are  
159 regulated by a limited number of *cis*-regulatory inputs, situated within close proximity to the genes they  
160 regulate.

### 161 **Distinct and sequential regulatory modules encode developmental stages**

162 Clustering of dynamically changing DHSs revealed that chromatin activated at different stages of  
163 hematopoiesis display differential enrichment for transcription factor recognition sequences, indicating  
164 stage-specific transcriptional regulation of *cis*- elements. This, however, does not resolve the temporal  
165 interactions between individual DHSs and individual *trans*- regulators and how this relationship shapes  
166 the developmental response of a DHS. Given the observed global correlated changes between the  
167 transcription factor expression levels and the accessibility of the DHSs containing their cognate  
168 recognition sequences (**Figure 3a**) we sought to quantify the contribution of individual TFs to the  
169 dynamic changes in DNase I density at individual regulatory *cis*-elements. We capitalized on our dense  
170 sampling approach and applied a regression strategy where the activity of an individual regulatory  
171 element (i.e. DNase I cleavage density) is modelled as a function of the gene expression profiles of  
172 developmentally regulated TFs with a compatible recognition sequence harbored within each DHS  
173 (**Figure 3b** and **Methods**). We controlled for weak and ambiguous association of TFs recognizing  
174 degenerate motifs using elastic-net regularization (**Methods**). We applied this approach to all of the  
175 11,805 dynamically changing DHSs, identifying 11,734 (>99% of changing DHSs) with at least one  
176 explanatory TF regulator (**Methods**) and 88 developmentally regulated TFs associated with at least one  
177 DHS, where the regression coefficients broadly correspond to the strength of association of a TF with an  
178 individual DHS (**Supplementary Figure 9**). Overall, 5 TFs on average, were positively associated with  
179 each DHS, suggesting that a small subset of TFs regulate the developmental activity of individual *cis*-  
180 elements. We then evaluated whether the regression results hold any predictive capacity against the  
181 frequency of motifs for the same TFs. Using a naïve Bayes classification model (**Methods**) we tried to  
182 predict the cluster each DHS belongs to by supplying either the occurrences of individual TF motifs or the  
183 elastic-net regression coefficients for each TF. We found that elastic-net regression coefficients provide a  
184 1.77-fold accuracy over TF motif counts (62% vs. 35% accuracy rate) in predicting the DHS cluster  
185 (**Supplementary Figure 10**). This suggests that the developmental response of a DHS is shaped by co-  
186 regulated transcription factors that occupy the DHS rather than the absolute frequency of binding TFs as  
187 determined by the TF recognition sequences harbored in a DHS.

188 We next asked to what extent the activity of DHSs with similar temporal accessibility patterns are  
189 regulated by a coherent set of TF regulators. We selected 52 TFs positively associated with at least 200  
190 DHSs and performed unsupervised hierarchical clustering based on their regression coefficients computed  
191 for each DHS (**Figure 3c** and **Methods**). This analysis resolved the temporal associations between  
192 transcription factors and their target DHS into a sequence of five discrete and largely non-overlapping

193 regulatory modules, reflective of developmental stages of erythropoiesis (Figure 3d). Module 1 consists  
194 of known HSPC transcriptional regulators (e.g. ERG<sup>28</sup>, MEIS1<sup>39</sup>, MYCN<sup>40</sup>) which are positively  
195 associated with early closing DHSs in clusters E1 and E2. In modules 2 and 3, transcription factors  
196 associated with commitment of hematopoietic progenitors to the different myeloid lineages (e.g.  
197 CEBPA<sup>41</sup>, MYB<sup>42</sup>, FLI1<sup>43</sup>, RUNX1<sup>44</sup>) interact with DHSs in clusters E2 and E3. Modules 4 and 5 define  
198 the erythroid-specific regulatory landscape as known erythroid regulators (e.g. GATA1<sup>45</sup>, KLF1<sup>20</sup>,  
199 RXRA<sup>46</sup> and FOXO3<sup>47</sup>) positively interact with activated DHSs in clusters E4 and E5.

200 Plotting the fraction of DHSs in each cluster positively associated with each TF (**Figure 3d**) highlights  
201 the major drivers of chromatin accessibility in each developmental stage. Particularly, ERG appears as a  
202 major regulator of the HPSC stage as it is positively associated with ~25% of DHSs in clusters E1 and E2.  
203 Although ERG has been long implicated in HSPC regulation, it is only recently its role as a critical  
204 regulator of HSPC survival has been appreciated<sup>48</sup>. Interestingly, KLF12 also appears to share a  
205 significant proportion of the early chromatin landscape, although its role in HSPC regulation is not fully  
206 elucidated. Overexpression of the critical HSC regulator Evi-1 in mice, resulted in maintenance of the  
207 quiescent phenotype of murine HSCs along with the more than 12-fold increase in *Klf12* expression<sup>49</sup>. In  
208 another experiment, sustained expression of *Hlf* in mice also resulted in enrichment of *Klf12* in more  
209 primitive hematopoietic compartments<sup>50</sup>, thus implicating KLF12 in the HSPC regulation. Apart from the  
210 canonical erythroid transcription factors, we identified MXI1 among the top regulators of the erythroid  
211 chromatin landscape. Knockdown of *Mxi1* in mice, blocks chromatin condensation and impairs  
212 enucleation of mouse erythroblasts, highlighting the role of MXI1 in erythroid maturation<sup>51</sup>. Additionally,  
213 we find CTCF to be positively associated with a large portion of the erythroid-specific chromatin (~25%  
214 of DHSs in clusters E4 and E5), while we find strong enrichment for DHS harboring CTCF motifs in  
215 predicted chromatin loops from Hi-C data generated from *ex vivo* cultured human erythroid progenitors  
216 (**Supplementary Figure 11**). These findings are consistent with the evidence highlighting the role of  
217 CTCF in establishing the erythroid-specific chromatin landscape<sup>52,53</sup>.

218 Taken together, these findings illustrate the dynamic interaction of the *cis*- and the *trans*- regulatory  
219 landscape during erythropoiesis and their organization into well-defined and discrete regulatory modules  
220 of associated DHSs with their cognate transcription factors, reflecting distinct stages of erythroid  
221 development.

## 222 **A sequence of abrupt lineage restriction events marks erythropoiesis**

223 The organization of chromatin and transcription factors into defined regulatory modules corresponding to  
224 distinct stages of erythropoiesis indicates a functional relationship between lineage potential and module  
225 activity. To gain insight into whether these modules underpin lineage decision events we determined the  
226 lineage potential of the erythroid cultures by daily sampling a population of cells and assaying their  
227 multipotent and unipotent capacity for different myeloid lineages (**Figure 4a** and **Supplementary Figure**  
228 **12a**). Total number of colonies declined with the progress of differentiation resulting in an abrupt  
229 depletion of total progenitors on day 6 of differentiation (**Supplementary Figure 12b**). After 4 days of  
230 exposure to erythroid media, the most primitive and multipotent colonies (CFU-GEMM; granulocytic,  
231 erythroid, monocytic, megakaryocytic) were no longer detected (Figure 4b). Day 6 marked a second event  
232 of restriction of the fate potential as all unilineage colonies were no longer detected in the cultures.  
233 Specifically, frequency of erythroid progenitors (BFU-E) rapidly declined from day 5 to day 6 (**Figure**  
234 **4c**). Similarly, granulocytic/monocytic progenitors (CFU-GM) were depleted by day 6 of erythroid  
235 differentiation (**Supplementary Figure 12c**). Notably, none of the changes in clonogenic capacity were  
236 associated with any changes in the growth rate of the parental erythroid cultures, which remained constant  
237 throughout the differentiation (**Supplementary Figure 12d**), suggestive of an independent mechanism  
238 regulating this shift in progenitor population.

239 In addition to the above lineages, we specifically tested for the ability to differentiate into megakaryocytes  
240 during erythroid development by transferring cells, on a daily basis, from the primary erythroid culture to



241 megakaryopoiesis-inducing suspension cultures and tested for their ability to give rise to CD41<sup>+</sup>  
242 megakaryocytic populations (**Supplementary Figure 13a** and **Methods**). Consistent with the overall  
243 lineage restriction observed during colony-forming assays, erythroid cultures completely lose  
244 megakaryocytic potential on day 6 of the differentiation (**Figure 4c** and **Supplementary Figure 13b**).

245 The rapid changes observed in clonogenic capacity correspond to the transitions in the activity of  
246 regulatory modules (**Figure 4d**). Early depletion of primitive multipotent CFU-GEMM progenitors is  
247 concomitant with the transition from the HSPC-related modules (modules 1 and 2), while the decline of  
248 unipotent progenitors of all detectable myeloid lineages (granulocytic/monocytic, erythroid,  
249 megakaryocytic) coincides with the transition from a program with a broader myeloid signature to  
250 erythroid specific *cis*- and *trans*- landscape. Furthermore, because these rapid lineage restriction events  
251 are not associated with other abrupt changes in morphology or cell growth (**Supplementary Figure 13d**),  
252 these data suggest that the mechanism responsible for the exit from the progenitor stage is decoupled from  
253 maturation progress.

### 254 **Exit from the HSPC-related transcriptional program is shared between erythropoiesis and** 255 **megakaryopoiesis**

256 The silencing of the HPSC regulatory modules prior to lineage commitment suggested that exit from the  
257 progenitor state is necessary for erythroid commitment to proceed. We therefore asked whether this  
258 represents a canonical feature of hematopoietic development to any lineage. To investigate this, we  
259 focused on megakaryocytic differentiation, a process that shares both close common developmental  
260 origins<sup>54</sup> and key TF regulators with erythropoiesis<sup>55</sup>.

261 We induced *ex vivo* megakaryocytic differentiation and performed dense sampling of gene expression  
262 during development (**Figure 5a** and **Methods**). Developmentally regulated genes during  
263 megakaryopoiesis exhibit largely bipartite profiles similar to those observed during erythropoiesis  
264 (**Supplementary Figure 14**). To determine whether the transcriptional changes associated with exit from  
265 HSPC state during erythropoiesis are shared with megakaryopoiesis we examined the expression profiles  
266 of erythroid developmentally regulated genes during megakaryocytic differentiation. We observed highly  
267 correlated global expression profiles for early silenced transcripts (erythroid clusters G1 and G2) between  
268 the two lineages (median Spearman's  $\rho=0.76$  and  $0.62$ , respectively) (**Figure 5b**), with the exception of  
269 key regulators and canonical markers of megakaryopoiesis (*MEIS1*, *FLI1*, *PBX1*, *ITGA2B*, etc.) (**Figure**  
270 **5c**). In contrast, correlation for erythroid clusters G3-G5 was low (median Spearman's  $\rho \leq 0.13$ ).

271 Similar to erythropoiesis, we found that early downregulation of HSPC-related gene signature is  
272 associated with abrupt restriction of alternate lineage potential during megakaryopoiesis. Specifically, we  
273 found that cells sampled beyond day 3 of differentiation exhibit a reduction in both multipotent and  
274 unipotent progenitors of the erythroid and granulocytic/monocytic lineage (**Figure 5c** and  
275 **Supplementary Figure 15**). This observation is in line with the fact that megakaryopoiesis does not  
276 exhibit transient activation of myeloid gene program as exit from HSPC is rapidly succeeded by a  
277 megakaryocyte-specific gene signature. This finding is compatible with the recently revised  
278 hematopoietic tree according to which megakaryocytes directly emerge from the primitive HSPC  
279 compartments bypassing the common myeloid progenitor<sup>56-58</sup>.

280 Conclusively, these results indicate the existence of a shared mechanism between erythropoiesis and  
281 megakaryopoiesis driven by a common set of TFs which mediates the exit from HSPC state signaling  
282 differential lineage potential response for erythropoiesis and megakaryopoiesis.

### 283 **Transient acquisition of a myeloid signature precedes erythroid commitment but not** 284 **megakaryocytic.**

285 Genomic and functional findings on population-level during *ex vivo* erythropoiesis suggest that erythroid  
286 development transitions through a state with permissive alternate lineage potential prior to erythroid  
287 commitment whereas megakaryocytes appear to rapidly commit after exit from HSPC. As lineage

288 decision events resolve in individual progenitors, we sought to resolve the fate commitment kinetics and  
289 the differentiation trajectories of erythropoiesis and megakaryopoiesis by jointly analyzing transcriptional  
290 dynamics in single cells along the two lineages. To this end, we analyzed transcriptional changes from  
291 more than 50,000 single cells sampled from frequent intervals along both the *ex vivo* erythroid and  
292 megakaryocytic differentiation (**Figure 6a**). Overall, we found that single-cell gene expression profiles to  
293 be highly concordant with total RNAseq data as aggregated gene expression from single-cell RNA-seq  
294 correlated very well with RNA-seq performed in bulk cells (**Supplementary Figure 16**).

295 Principal component analysis (PCA) using the top 2,000 variable genes readily resolved the two primary  
296 axes of differentiation. Trajectories from HSPC to terminally committed lineages are resolved along PC2  
297 while PC1 distinguishes the erythroid and megakaryocytic terminal fates (**Figure 6b**). Furthermore, PCA  
298 highlights the lineage commitment timepoint as cells sampled on day 4 and thereon, from either culture,  
299 already exhibit distinct topologies on the PCA projection. In order to infer rate of transcription and derive  
300 the direction of differentiation, we capitalized on splicing kinetics (RNA velocity) to derive latent  
301 pseudotime (**Figure 6c**). Overall, pseudotime correlated well with actual sampling time (Pearson's  
302  $r=0.725$ ).

303 Cells were clustered using Leiden community detection algorithm<sup>59</sup> and based on their between affinities  
304 cell clusters were collapsed to 7 distinct populations corresponding to discrete developmental stages.  
305 Developmental pseudotime and transitions between populations were inferred based on RNA velocity  
306 (**Figure 6d** and **Supplemental Figure 18a-c**). Overall, we found the populations to be highly  
307 homogeneous in terms of *ex vivo* culture sample composition. Not unexpectedly, we observed higher  
308 sample admixture in populations corresponding to early time-points, consistent with the notion that cells  
309 at this stage had yet to establish lineage fate (**Supplementary Figure 18d**).

310 Using lineage trajectories inferred from transcriptional transitions between populations, we identified two  
311 major pathways starting from a cluster with HSPC signature (HSPC cluster) and leading to terminal  
312 megakaryocytic and erythroid fates (**Figure 6c**). Transitions from HSPC cluster to lineage specific  
313 clusters involves two clusters with progenitor gene signature (MPP1, and MPP2) each of them stemming  
314 from the HSPC cluster. MPP1 consists primarily of cells sampled from megakaryocytic cultures while  
315 ~25% of the cells in the population are derived from day 2 of the erythroid differentiation. MPP1  
316 maintains a broader early progenitor signature (**Supplementary Figure 18e, f**) and transitions to a  
317 population with early Mk signature (Mk1) which eventually gives rise to mature megakaryocytic  
318 population (Mk2). MPP2 is composed almost exclusively of early (day 2 and day 4) erythroid cells and  
319 appears as a nodal cluster with affinities to both the early erythroid cluster as well as the Mk primed  
320 MPP1. Importantly, MPP2 exhibits gene expression signature characteristic of various myeloid subtypes  
321 (**Supplemental Figure 18e-f**) expressing critical myeloid regulators alongside megakaryocytic and  
322 erythroid ones (**Supplementary Table 6**). Stage-specific TF network reconstruction using TF-DHS and  
323 DHS-gene assignments (**Figure 7a,b**), reveals the myeloid signature is orchestrated by a core network of  
324 critical myeloid regulators (SPI1/PU.1, CEBPA, and FLI1), specific to MPP2 (**Figure 7c**). This is  
325 compatible to single cell TF protein dynamics during *ex vivo* erythropoiesis, demonstrating that multiple  
326 TFs of alternate hematopoietic lineages are active in early progenitors prior to emergence of CFU-e  
327 populations<sup>60</sup>. Furthermore, early erythroid progenitors display affinities with myeloid and basophilic  
328 lineages transiently emerging in the culture. Here, in an attempt to identify the origin of this myeloid  
329 population present in our experiments, we performed FACS timecourse for the myeloid marker CD33  
330 during both erythropoiesis and megakaryopoiesis. We find that the CD33<sup>+</sup> population a subset of CD34<sup>+</sup>  
331 HSPCs as >80% of uncultured CD34<sup>+</sup> are also positive for CD33. During erythroid differentiation, we  
332 find that cells transiently undergo a state of CD33<sup>+</sup>/CD117<sup>+</sup>, whereby day 6 the majority (~70%) has  
333 transitioned to CD33<sup>-</sup>/CD117<sup>+</sup> (**Supplementary Figure 19**). In contrast, expression patterns of CD33 and  
334 CD41 during *ex vivo* megakaryopoiesis are mutually exclusive, confirming the erythroid-specific origin  
335 of the myeloid population.



336 In order to compare our findings to steady state hematopoiesis, we analyzed previously published single-  
337 cell RNAseq data from FACS fractionated BM-derived hematopoietic populations<sup>61</sup>. Trajectory inference  
338 on Force Atlas embedding using PAGA and DPT pseudotime analysis revealed two major differentiation  
339 pathways originating from a developmentally primitive population with HSPC. One with defined  
340 erythroid signature, and one exhibiting a myeloid gene expression profile (**Supplementary Figure 20a**).  
341 Although we were able to detect a few cells with megakaryocytic signature concentrated close to HSPCs,  
342 their population is very small and no distinction between primitive and mature megakaryocytes could be  
343 detected. Additionally, gene expression patterns of megakaryocytic markers and TFs are not well defined  
344 to infer differentiation trajectory (**Supplementary Figure 20a**). Upon determination of cell clusters  
345 (**Supplementary Figure 20b**) we detected a population of cells which expresses several myeloid markers  
346 and particularly those of basophils (e.g., *LMO4*, *CLC*), and appears to originate from two populations  
347 early on the erythroid trajectory (**Supplementary Figure 20b**). In order to compare gene expression  
348 profiles along the erythroid trajectory inferred from either *ex vivo* differentiated erythroid cells or BM  
349 fractionated populations we correlated gene expression profiles from 1,000 top highly expressed genes in  
350 both datasets. This revealed that *ex vivo* erythropoiesis recapitulates exceptionally well the gene  
351 expression dynamics from native erythroid populations with median Spearman's  $\rho=0.81$  (**Supplementary**  
352 **Figure 21**). These results further support our population-level findings about the transient emergence of a  
353 population during erythroid development that maintains myeloid capacity. The affinity between the  
354 basophilic lineage and the erythroid has been previously described<sup>61,62</sup> and it has been suggested that  
355 basophils derive from erythro-myeloid progenitors<sup>63</sup>.

## 356 Discussion

357 Here, we systematically link individual transcription factors and their target *cis*- elements along *ex vivo*  
358 human erythropoiesis, resolving how these elements organize temporally, encoding lineage commitment  
359 and differentiation during hematopoiesis. More recently, multiple efforts have extensively studied the  
360 individual (*cis*- and *trans*-) regulatory components involved in erythropoiesis<sup>22</sup> as well as other diverse  
361 hematopoietic lineages<sup>9,64-67</sup>. The bulk of these efforts however base their findings either on  
362 immunophenotypically defined hematopoietic populations, or single-cell dissection of steady state  
363 heterogeneous sources, where developmental relationships between cells within a heterogeneous steady-  
364 state population can only be inferred<sup>13,15,61,68</sup>. In this work we overcome the limitations associated with  
365 immunophenotypic isolation of hematopoietic populations<sup>57,69</sup> which often fail to capture transient or rare  
366 populations, while enrichment for specific populations is entirely dependent on the immunophenotypic  
367 panel used for fractionation<sup>70</sup>. By capitalizing on the continuity of the differentiating populations during  
368 *ex vivo* erythropoiesis we finely map chromatin accessibility and gene expression dynamics enabling the  
369 direct and repeated measurement of the dynamic epigenetic landscape along a defined lineage trajectory.  
370 In addition, a dense sampling approach enables the unbiased detection of transient events occurring over  
371 short intervals that would otherwise be missed by sparse sampling methodologies.

372 Through integrative analysis of chromatin accessibility and gene expression during erythropoiesis we  
373 draw thousands of links between individual distal regulatory elements and their target genes at much  
374 higher resolution than that afforded by other methods. This approach revealed a sequence of discrete,  
375 non-overlapping regulatory modules comprising of interacting transcription factors and individual *cis*-  
376 regulatory elements, corresponding to distinct stages of erythroid development. Strikingly, the transition  
377 between the activity of these modules coincides with a sequence of experimentally validated rapid lineage  
378 restriction events. We found that the exit from the program associated with the HSPC state occurred  
379 independent of lineage outcome, as it was also identified during *ex vivo* megakaryopoiesis. Moreover,  
380 comparison of developmental transcriptomics of single cells along erythropoiesis and megakaryopoiesis  
381 reveals that exit from HSPC occurs over the same developmental interval for both lineages, indicative of  
382 a mechanism independent of the cytokine environment. This finding adds to previous reports that  
383 activation of murine bone marrow HSCs with different lineage cytokines induces a common repression

384 mechanism of HSC signature while activates genes implicated in differentiation in a cytokine independent  
385 fashion<sup>71</sup>

386 Upon exit from the HSPC state we found the two lineages to exhibit differential commitment kinetics.  
387 Erythroid differentiation maintains a broader myeloid lineage capacity (Ery, G/M, Mk) prior to erythroid  
388 commitment as a result of a transient upregulation of a regulatory program involving canonical myeloid  
389 transcription factors (FLI1, SPI1, C/EBPs, GATA2, etc.). Network analysis in the progenitor stage prior  
390 to erythroid commitment, demonstrates that FLI1 is a central TF with extensive affinities to other  
391 transcriptional regulators, ultimately gatekeeping the fate choice between the megakaryocytic and  
392 erythroid lineage. There are several lines of evidence from single-cell assays in both mouse and human  
393 hematopoiesis suggesting that erythroid, megakaryocytic and basophilic lineages emerge from a shared  
394 population<sup>13,16,60,64,72,73</sup>, while mass cytometry dynamics of lineage-specific transcription factors ascribe  
395 FLI1 the role of “gatekeeper” between the erythroid and the megakaryocytic fate<sup>60</sup>. The findings  
396 presented here, however, demonstrate that this lineage-permissive transcriptional program is restricted  
397 only to erythropoiesis. This is compatible with previous experimental evidence demonstrating the affinity  
398 of basophilic lineage to the erythroid branch<sup>61</sup>, specifically. Additionally, results from transgenic mice  
399 lacking a set of the C/EBP family of myeloid regulators that exhibit decreased erythroid output<sup>74</sup>. In  
400 contrast, transcriptional, functional and phenotypic evidence from *ex vivo* megakaryopoiesis presented  
401 here, suggests rapid megakaryocytic commitment upon HSPC exit. These results align well with the  
402 growing evidence suggesting that megakaryocytic commitment is occurring earlier compared to erythroid  
403 fate<sup>75</sup> and that megakaryocytic lineage arises directly from the primitive hematopoietic compartments<sup>57,76-  
404 78</sup>.

405 In order to reconcile our findings on lineage commitment from bulk populations with transcriptional  
406 dynamics from individual cells we compiled one of the most comprehensive analyses of single-cell gene  
407 expression along a closely monitored developmental system, so far. Furthermore, this dataset represents  
408 the first, to our knowledge, single-cell description of gene expression dynamics along the *ex vivo*  
409 megakaryocytic development from purified HSPCs. Although different approaches have been suggested  
410 to enrich for megakaryocyte and platelet biased progenitors and dissection of the bipotent MEPS<sup>79-81</sup> there  
411 is no consensus purification scheme to isolate cells at different stages of megakaryocytic development  
412 with the resolution available for erythroid development<sup>82,83</sup>. This is primarily due to the rarity of Mk cells  
413 in the bone marrow<sup>84,85</sup> and the fragility of the mature large endomitotic megakaryocytes. Here, however,  
414 we present an unbiased global view of gene expression and lineage commitment dynamics of  
415 megakaryocytic development based on equiproportional sampling of populations along  
416 megakaryopoiesis.

417 Overlaying the information of sampling timepoint of each population allowed us to match shifts in TF  
418 expression in single-cells to the regulatory programs identified from our population-level experiments.  
419 Strikingly, our single-cell based observations recapitulate both our *ex vivo* population-based findings as  
420 well as single-cell transcriptional dynamics from bone marrow fractionated populations with remarkable  
421 fidelity. This suggests that highly synchronized rapid shifts in gene expression levels of lineage regulators  
422 across individual cells, occurring over short intervals of developmental time, underpin the changes  
423 observed in bulk populations. This contrasts the current sentiment hinging on observations from single-  
424 cell analyses where variability in the chromatin and transcriptional landscapes among steady- are  
425 interpreted as gradients of continuous regulatory states<sup>13,14,68,86</sup>.

426 Here we present novel insights into the developmental regulatory dynamics during hematopoiesis  
427 illuminating mechanisms of lineage commitment, unable to interrogate previously due to sampling biases  
428 and limitations. Although we draw parallels with steady-state *in vivo* derived data, the artificial nature of  
429 the *ex vivo* culture systems can be a confounding factor. Nevertheless, we highlight the utility of *ex vivo*  
430 development systems in studying rare or otherwise inaccessible populations *in vivo* and provide a  
431 generalizable framework of how interactions between the *trans*- environment and the chromatin instruct  
432 fate choice and lineage commitment during development. Additionally, the dense sampling and the

433 systematic linkage between distal elements and target promoters results in high-resolution maps charting  
434 the stage-specific activity of regulatory elements. Such elements can prove particularly useful in  
435 transgene-based therapies where the efficacy of these methods relies on the precise modulation of gene  
436 expression in a developmental and lineage-specific manner.

437 **Author contributions:** G.G., M.I., and N.P. performed the experiments. G.G., A.N., T.S., and J.V.  
438 performed data analysis. G.G., N.P., and J.V. designed the experiments. J.S., M.Y., and J.V. supervised  
439 the study and provided consultation. G.G., and J.V. wrote the manuscript. J.V. conceived the study. All  
440 authors approved the manuscript.

441 **Acknowledgments:** The authors would like to thank Daniel Bates, Morgan Diegel, Douglas Dunn,  
442 Fidencio Neri, Ericka Otterman, Shinny Vong, and Alister Funnell from the Altius Institute for  
443 Biomedical Sciences for help in sequencing and genome editing. We also thank John Lazar and Thalia  
444 Papayannopoulou for their critical review on the manuscript.

445 **Data availability:** All DNase I and RNA-seq data produced as part of this manuscript is freely available  
446 by request and has been submitted to SRA. Adult erythroid Hi-C data was downloaded from ERA  
447 (accessions SRX3058042 and SRX3058043). Adult CD43+ HSPC Hi-C data obtained from ENA  
448 (accession ERR436024). Human bone marrow single-cell data from Pellin *et al.*, 2019, *Nat. Comms.* was  
449 download from ERA (accessions SRX4455330, SRX4455331, SRX4455332, SRX4455333,  
450 SRX4455334, SRX4455335 and SRX4455336).

451 **Code availability:** All scripts and code used to process and analyze data herein are available upon  
452 request.

453 **Figure Legends**

454 **Figure 1. Comprehensive identification of regulatory landscape developmental dynamics.**

455 (a) Dense DNase I-seq and RNA-seq time course with daily sampling during the 12-day *ex vivo* erythroid  
456 differentiation induced from CD34<sup>+</sup> HSPCs. (b) PCA analysis using all detected DHSs (79,085 Hotspots  
457 5% FDR) across all samples (12 time points, 3 donors). The arrow denotes the differentiation trajectory  
458 from day 0 to day 12. (c) PCA analysis using all 24,849 detected genes across all samples (13 time points,  
459 3 donors). The arrow denotes the differentiation trajectory from day 0 to day 12. (d) Chromatin  
460 accessibility tracks for each day of differentiation with DNase Hypersensitive Sites (DHSs) harbored  
461 around the *TFRC* locus. (e) Identification of significantly changing DHS and genes with robust linear  
462 regression analysis. Scatterplots show *TFRC* expression and DNase I density for two upstream DHS. Dots  
463 represent normalized values for each of the 3 donors. Dashed line represents the fitted regression spline.

464 **Figure 2. Temporal compartmentalization of the *cis*- and *trans*- epigenetic landscape during**  
465 **erythropoiesis exhibits**

466 (a) *K*-means clustering of 11,805 changing DHS resulted in 5 clusters (E1-E5) with sequential activity  
467 profile for each cluster. Values are z-score of per day average normalized DHS counts from 3 donors. (b)  
468 *K*-means clustering of 5,792 developmentally regulated genes resulted in 5 clusters (G1-G5). Values are  
469 z-score of per day average normalized FPKM from 3 donors. (c) A matrix showing the enrichment score  
470 (log<sub>2</sub>-ratio observed over expected) for any given DHS cluster, around each developmentally regulated  
471 DHS ( $\pm 50$ kb from TSS). Highlighted in red is cluster G3 which is enriched for both late downregulated  
472 DHS of cluster E3 and early upregulated from cluster E4. \*  $X^2$  test  $p$ -value < 0.05 (d) Correlation density  
473 plot between developmental genes and developmental DHS  $\pm 250$ kb around the gene promoter. Grey  
474 shaded area highlights enrichment of correlations within  $\pm 50$ kb around the gene promoter. (e) DNase I  
475 accessibility track of the *CDH1* locus during erythroid differentiation, highlighting the accessibility of 3  
476 nearby DHS correlated to *CDH1* expression. (f) DNase I accessibility track of the *CDH1* locus in  
477 HUDEP-2 cells depicting the genetic knockout of the *CDH1* promoter and two upstream DHS (-12, and -  
478 5) (above) along with the resulted ablation in CDH1 protein expression as assessed by flow cytometry  
479 (below).

480 **Figure 3. Systematic modelling of *cis*- and *trans*- element temporal interactions reveals discrete**  
481 **regulatory modules during erythropoiesis.**

482 (a) Developmental responses of DHS accessibility and transcription factor expression levels were found  
483 to be correlated across the genome. (b) The density of a given developmental DHS is modelled after the  
484 TF binding motif composition and the expression of the binding TFs using elastic-net regression. The  
485 model returns a coefficient for each pair of DHS and binding TF which denotes how strongly (positively  
486 or negatively) the TF expression is associated with the accessibility of the particular DHS. (c)  
487 Hierarchical clustering of 52 highly connected TFs based on the cosine distances of the regression  
488 coefficient from 11,734 DHS reveals 5 clusters of developmentally regulated TFs. Transcription factors  
489 along with their positively associated DHS comprise a regulatory module (modules 1-5). (d) The fraction  
490 of DHS per cluster positively associated with a TF identifies the major drivers of chromatin accessibility  
491 during erythropoiesis.

492 **Figure 4. Lineage restriction events during erythropoiesis reflect the sequence of regulatory**  
493 **programs.**

494 (a) Schematic diagram of lineage potential assays during the first 7 days of *ex vivo* erythropoiesis. Cells  
495 were sampled daily and transferred to lineage-permissive media. Multilineage capacity was determined as  
496 frequency of CFU-GEMM progenitors. Erythroid potential as frequency of BFU-Es and megakaryocytic  
497 potential as frequency of CD41<sup>+</sup> cells. (b) Frequency of multipotent CFU-GEMM in methylcellulose  
498 assay from cells sampled over the course of erythroid differentiation. (c) Frequency of unipotent erythroid  
499 progenitor colonies (BFU-E) in methylcellulose assay (red line) and frequency of CD41<sup>+</sup> cells after

500 transplantation in secondary megakaryocytic media (blue line) (d) Changes in lineage potential coincide  
501 with the transitions between the regulatory modules identified earlier. Transition from modules 1 and 2 to  
502 module 3 reflects the loss of multipotency occurring between days 3 and 4, while transition from module  
503 3 to erythroid modules 4 and 5 coincides with the depletion of unipotent progenitors and entry to  
504 erythroid maturation (days 5 to 6). Error bars denote  $\pm 1$  SE of the mean from 4 replicates for colony-  
505 forming assays, 2 replicates for CD41<sup>+</sup> frequency. Asterisk denotes statistically significant difference in  
506 CFU-GEMM and BFU-E counts from day 1 ( $P$ -value < 0.05 Student's T-test). CFU-GEMM: Colony  
507 Forming Unit - Granulocytic, Erythroid, Macrophage, Megakaryocytic. BFU-E: Burst Forming Unit-  
508 Erythroid.

509 **Figure 5. A shared transcriptional program drives the exit from HSPC state early in erythropoiesis**  
510 **and megakaryopoiesis.**

511 (a) Dense RNA-seq time course during *ex vivo* megakaryopoiesis induced from CD34<sup>+</sup> HSPCs. (b)  
512 Correlation of gene expression profiles between erythropoiesis and megakaryopoiesis across the erythroid  
513 gene clusters G1-G5. (c) Expression profiles during megakaryocytic development, ordered by their  
514 correlation score to their erythroid counterparts from erythroid clusters G1 and G2. (d) Lineage potential  
515 assay during *ex vivo* megakaryopoiesis whereby erythroid potential was assessed by subjecting cells to a  
516 secondary erythroid culture (left). Frequency of CD235a<sup>+</sup> erythroid cells after 12-day culture into  
517 secondary erythroid media (right).

518 **Figure 6. Single-cell gene expression dynamics demonstrate distinct cell states during erythroid and**  
519 **megakaryocytic differentiation.**

520 (a) CD34<sup>+</sup> cells from a single donor were *ex vivo* differentiated towards the erythroid and the  
521 megakaryocytic lineage. Including an uncultured sample from the same donor (CD34<sup>+</sup> day 0), ~50,000  
522 cells were totally sampled during 5 time-points from each lineage and subjected to single-cell RNA-seq.  
523 (b) PCA using the top 2000 variable genes. Cells are colored by the sampling day. Terminal erythroid  
524 (Ery) and megakaryocytic (Mk) states, as well as initial HSPC state are annotated, respectively. Red line  
525 denotes where the 90% of the cells sampled prior to day 4 are located (above line). (c) RNA velocity-  
526 based pseudotime or gene expression density on Force-Atlas graph of all cells based on RNA velocity  
527 estimates of top 2000 variable genes. (d) Cell populations from collapsed L

528 eiden clusters on FA graph. Sample composition of each population is represented as a pie chart. Arrows  
529 denote RNA velocity derived transitions between populations. Dashed lines represent PAGA  
530 connectivities. (e) Average expression intensity of gene sets representative of HSPC, Myeloid, Erythroid  
531 and Megakaryocytic states on identified cell populations.

532 **Figure 7. Defining of stage-specific erythroid regulatory networks.**

533 (a) Representative top differentially expressed TF genes between populations as identified by Wilcoxon  
534 sum rank test. (b) Schematic diagram of the regulatory network construction logic. Differentially  
535 expressed TFs among single-cell populations are assigned to their target genes based on elastic-net  
536 regression results. DHSs are linked to their target genes using correlation between population level DHS  
537 density and gene expression. (c) Regulatory networks initiated by TFs specific to each population. Up to  
538 top 50 target genes are shown for each TF. Transcription factors and select marker genes are annotated.



539 **References**

- 540 1. Dixon, J. R. *et al.* Chromatin architecture reorganization during stem cell differentiation. *Nature* **518**,  
541 331–336 (2015).
- 542 2. Ho, L. & Crabtree, G. R. Chromatin remodelling during development. *Nature* vol. 463 474–484  
543 (2010).
- 544 3. Stergachis, A. B. *et al.* Developmental fate and cellular maturity encoded in human regulatory DNA  
545 landscapes. *Cell* **154**, 888–903 (2013).
- 546 4. Antoniani, C., Romano, O. & Miccio, A. Concise Review: Epigenetic Regulation of Hematopoiesis:  
547 Biological Insights and Therapeutic Applications. *STEM CELLS Translational Medicine* vol. 6  
548 2106–2114 (2017).
- 549 5. Orkin, S. H. & Zon, L. I. Hematopoiesis: an evolving paradigm for stem cell biology. *Cell* **132**, 631–  
550 644 (2008).
- 551 6. Cullen, S. M., Mayle, A., Rossi, L. & Goodell, M. A. Hematopoietic stem cell development: an  
552 epigenetic journey. *Curr. Top. Dev. Biol.* **107**, 39–75 (2014).
- 553 7. Goode, D. K. *et al.* Dynamic Gene Regulatory Networks Drive Hematopoietic Specification and  
554 Differentiation. *Dev. Cell* **36**, 572–587 (2016).
- 555 8. González, A. J., Setty, M. & Leslie, C. S. Early enhancer establishment and regulatory locus  
556 complexity shape transcriptional programs in hematopoietic differentiation. *Nat. Genet.* **47**, 1249–  
557 1259 (2015).
- 558 9. Lara-Astiaso, D. *et al.* Immunogenetics. Chromatin state dynamics during blood formation. *Science*  
559 **345**, 943–949 (2014).
- 560 10. Iwasaki, H. *et al.* The order of expression of transcription factors directs hierarchical specification of  
561 hematopoietic lineages. *Genes Dev.* **20**, 3010–3021 (2006).
- 562 11. Zhu, J. & Emerson, S. G. Hematopoietic cytokines, transcription factors and lineage commitment.  
563 *Oncogene* vol. 21 3295–3313 (2002).
- 564 12. Winter, D. R. & Amit, I. The role of chromatin dynamics in immune cell development. *Immunol.*  
565 *Rev.* **261**, 9–22 (2014).
- 566 13. Buenrostro, J. D. *et al.* Integrated Single-Cell Analysis Maps the Continuous Regulatory Landscape  
567 of Human Hematopoietic Differentiation. *Cell* **173**, 1535–1548.e16 (2018).
- 568 14. Velten, L. *et al.* Human haematopoietic stem cell lineage commitment is a continuous process. *Nat.*  
569 *Cell Biol.* **19**, 271–281 (2017).
- 570 15. Corces, M. R. *et al.* Lineage-specific and single-cell chromatin accessibility charts human  
571 hematopoiesis and leukemia evolution. *Nat. Genet.* **48**, 1193–1203 (2016).
- 572 16. Drissen, R. *et al.* Distinct myeloid progenitor–differentiation pathways identified through single-cell  
573 RNA sequencing. *Nature Immunology* vol. 17 666–676 (2016).
- 574 17. Weinreb, C., Wolock, S., Tusi, B. K., Socolovsky, M. & Klein, A. M. Fundamental limits on  
575 dynamic inference from single-cell snapshots. *Proc. Natl. Acad. Sci. U. S. A.* **115**, E2467–E2476  
576 (2018).
- 577 18. Stegle, O., Teichmann, S. A. & Marioni, J. C. Computational and analytical challenges in single-cell  
578 transcriptomics. *Nat. Rev. Genet.* **16**, 133–145 (2015).
- 579 19. Jacobsen, S. E. W. & Nerlov, C. Haematopoiesis in the era of advanced single-cell technologies.  
580 *Nat. Cell Biol.* **21**, 2–8 (2019).
- 581 20. Cantor, A. B. & Orkin, S. H. Transcriptional regulation of erythropoiesis: an affair involving  
582 multiple partners. *Oncogene* **21**, 3368–3376 (2002).
- 583 21. Perry, C. & Soreq, H. Transcriptional regulation of erythropoiesis. Fine tuning of combinatorial  
584 multi-domain elements. *Eur. J. Biochem.* **269**, 3607–3618 (2002).
- 585 22. Ludwig, L. S. *et al.* Transcriptional States and Chromatin Accessibility Underlying Human  
586 Erythropoiesis. *Cell Rep.* **27**, 3228–3240.e7 (2019).
- 587 23. Giarratana, M.-C. *et al.* Ex vivo generation of fully mature human red blood cells from  
588 hematopoietic stem cells. *Nat. Biotechnol.* **23**, 69–74 (2005).



- 589 24. Oudelaar, A. M. *et al.* Dynamics of the 4D genome during in vivo lineage specification and  
590 differentiation. *Nat. Commun.* **11**, 2722 (2020).
- 591 25. Fraser, J. *et al.* Hierarchical folding and reorganization of chromosomes are linked to transcriptional  
592 changes in cellular differentiation. *Mol. Syst. Biol.* **11**, 852 (2015).
- 593 26. Lawrence, H. J. *et al.* Loss of expression of the Hoxa-9 homeobox gene impairs the proliferation and  
594 repopulating ability of hematopoietic stem cells. *Blood* **106**, 3988–3994 (2005).
- 595 27. Chen, M. J., Yokomizo, T., Zeigler, B. M., Dzierzak, E. & Speck, N. A. Runx1 is required for the  
596 endothelial to haematopoietic cell transition but not thereafter. *Nature* vol. 457 887–891 (2009).
- 597 28. Loughran, S. J. *et al.* The transcription factor Erg is essential for definitive hematopoiesis and the  
598 function of adult hematopoietic stem cells. *Nat. Immunol.* **9**, 810–819 (2008).
- 599 29. Mifsud, B. *et al.* Mapping long-range promoter contacts in human cells with high-resolution capture  
600 Hi-C. *Nat. Genet.* **47**, 598–606 (2015).
- 601 30. Huang, P. *et al.* Comparative analysis of three-dimensional chromosomal architecture identifies a  
602 novel fetal hemoglobin regulatory element. *Genes Dev.* **31**, 1704–1713 (2017).
- 603 31. Thurman, R. E. *et al.* The accessible chromatin landscape of the human genome. *Nature* **489**, 75–82  
604 (2012).
- 605 32. Pal, K., Forcato, M. & Ferrari, F. Hi-C analysis: from data generation to integration. *Biophys. Rev.*  
606 **11**, 67–78 (2019).
- 607 33. Dixon, J. R. *et al.* Topological domains in mammalian genomes identified by analysis of chromatin  
608 interactions. *Nature* **485**, 376–380 (2012).
- 609 34. Ohgami, R. S., Chisholm, K. M., Ma, L. & Arber, D. A. E-cadherin is a specific marker for erythroid  
610 differentiation and has utility, in combination with CD117 and CD34, for enumerating myeloblasts  
611 in hematopoietic neoplasms. *Am. J. Clin. Pathol.* **141**, 656–664 (2014).
- 612 35. Armeanu, S., Bühring, H. J., Reuss-Borst, M., Müller, C. A. & Klein, G. E-cadherin is functionally  
613 involved in the maturation of the erythroid lineage. *J. Cell Biol.* **131**, 243–249 (1995).
- 614 36. Armeanu, S., Müller, C. A. & Klein, G. Involvement of E-cadherin in the development of erythroid  
615 cells; Subject heading. *Hematology* **5**, 307–316 (2000).
- 616 37. Cermak, T., Starker, C. G. & Voytas, D. F. Efficient design and assembly of custom TALENs using  
617 the Golden Gate platform. *Methods Mol. Biol.* **1239**, 133–159 (2015).
- 618 38. Sakuma, T. *et al.* Efficient TALEN construction and evaluation methods for human cell and animal  
619 applications. *Genes Cells* **18**, 315–326 (2013).
- 620 39. Argiropoulos, B., Yung, E. & Humphries, R. K. Unraveling the crucial roles of Meis1 in  
621 leukemogenesis and normal hematopoiesis. *Genes Dev.* **21**, 2845–2849 (2007).
- 622 40. Laurenti, E. *et al.* Hematopoietic stem cell function and survival depend on c-Myc and N-Myc  
623 activity. *Cell Stem Cell* **3**, 611–624 (2008).
- 624 41. Friedman, A. D. C/EBP $\alpha$  in normal and malignant myelopoiesis. *Int. J. Hematol.* **101**, 330–341  
625 (2015).
- 626 42. Greig, K. T., Carotta, S. & Nutt, S. L. Critical roles for c-Myb in hematopoietic progenitor cells.  
627 *Semin. Immunol.* **20**, 247–256 (2008).
- 628 43. Kawada, H. *et al.* Defective Megakaryopoiesis and Abnormal Erythroid Development in Fli-1 Gene-  
629 Targeted Mice. *International Journal of Hematology* vol. 73 463–468 (2001).
- 630 44. Ichikawa, M. *et al.* AML-1 is required for megakaryocytic maturation and lymphocytic  
631 differentiation, but not for maintenance of hematopoietic stem cells in adult hematopoiesis. *Nat.*  
632 *Med.* **10**, 299–304 (2004).
- 633 45. Evans, T. & Felsenfeld, G. The erythroid-specific transcription factor Eryf1: a new finger protein.  
634 *Cell* **58**, 877–885 (1989).
- 635 46. Evans, T. Regulation of hematopoiesis by retinoid signaling. *Experimental Hematology* vol. 33  
636 1055–1061 (2005).
- 637 47. Liang, R. *et al.* A Systems Approach Identifies Essential FOXO3 Functions at Key Steps of  
638 Terminal Erythropoiesis. *PLoS Genet.* **11**, e1005526 (2015).

- 639 48. Xie, Y. *et al.* Reduced Erg Dosage Impairs Survival of Hematopoietic Stem and Progenitor Cells.  
640 *Stem Cells* **35**, 1773–1785 (2017).
- 641 49. Kustikova, O. S. *et al.* Activation of Ev1l inhibits cell cycle progression and differentiation of  
642 hematopoietic progenitor cells. *Leukemia* vol. 27 1127–1138 (2013).
- 643 50. Wahlestedt, M. *et al.* Critical Modulation of Hematopoietic Lineage Fate by Hepatic Leukemia  
644 Factor. *Cell Rep.* **21**, 2251–2263 (2017).
- 645 51. Zhang, L., Flygare, J., Wong, P., Lim, B. & Lodish, H. F. miR-191 regulates mouse erythroblast  
646 enucleation by down-regulating Rik3 and Mxi1. *Genes Dev.* **25**, 119–124 (2011).
- 647 52. Hanssen, L. L. P. *et al.* Tissue-specific CTCF–cohesin-mediated chromatin architecture delimits  
648 enhancer interactions and function in vivo. *Nature Cell Biology* vol. 19 952–961 (2017).
- 649 53. Lee, J., Krivega, I., Dale, R. K. & Dean, A. The LDB1 Complex Co-opts CTCF for Erythroid  
650 Lineage-Specific Long-Range Enhancer Interactions. *Cell Rep.* **19**, 2490–2502 (2017).
- 651 54. Papayannopoulou, T. & Kaushansky, K. Evolving insights into the synergy between erythropoietin  
652 and thrombopoietin and the bipotent erythroid/megakaryocytic progenitor cell. *Exp. Hematol.* **44**,  
653 664–668 (2016).
- 654 55. Wickrema, A. & Crispino, J. D. Erythroid and megakaryocytic transformation. *Oncogene* vol. 26  
655 6803–6815 (2007).
- 656 56. Roch, A., Trachsel, V. & Lutolf, M. P. Brief Report: Single-Cell Analysis Reveals Cell Division-  
657 Independent Emergence of Megakaryocytes From Phenotypic Hematopoietic Stem Cells. *Stem Cells*  
658 **33**, 3152–3157 (2015).
- 659 57. Notta, F. *et al.* Distinct routes of lineage development reshape the human blood hierarchy across  
660 ontogeny. *Science* **351**, aab2116 (2016).
- 661 58. Yamamoto, R. *et al.* Clonal analysis unveils self-renewing lineage-restricted progenitors generated  
662 directly from hematopoietic stem cells. *Cell* **154**, 1112–1126 (2013).
- 663 59. Traag, V. A., Waltman, L. & van Eck, N. J. From Louvain to Leiden: guaranteeing well-connected  
664 communities. *Sci. Rep.* **9**, 5233 (2019).
- 665 60. Pali, C. G. *et al.* Single-cell proteomics reveal that quantitative changes in co-expressed lineage-  
666 specific transcription factors determine cell fate. *Cell Stem Cell* **24**, 812–820.e5 (2019).
- 667 61. Pellin, D. *et al.* A comprehensive single cell transcriptional landscape of human hematopoietic  
668 progenitors. *Nat. Commun.* **10**, 2395 (2019).
- 669 62. Zheng, S., Papalexi, E., Butler, A., Stephenson, W. & Satija, R. Molecular transitions in early  
670 progenitors during human cord blood hematopoiesis. *Mol. Syst. Biol.* **14**, e8041 (2018).
- 671 63. Görgens, A. *et al.* Revision of the human hematopoietic tree: granulocyte subtypes derive from  
672 distinct hematopoietic lineages. *Cell Rep.* **3**, 1539–1552 (2013).
- 673 64. Tusi, B. K. *et al.* Population snapshots predict early haematopoietic and erythroid hierarchies.  
674 *Nature* **555**, 54–60 (2018).
- 675 65. An, X. *et al.* Global transcriptome analyses of human and murine terminal erythroid differentiation.  
676 *Blood* **123**, 3466–3477 (2014).
- 677 66. Moignard, V. *et al.* Characterization of transcriptional networks in blood stem and progenitor cells  
678 using high-throughput single-cell gene expression analysis. *Nat. Cell Biol.* **15**, 363–372 (2013).
- 679 67. Gazit, R. *et al.* Transcriptome analysis identifies regulators of hematopoietic stem and progenitor  
680 cells. *Stem Cell Reports* **1**, 266–280 (2013).
- 681 68. Macaulay, I. C. *et al.* Single-Cell RNA-Sequencing Reveals a Continuous Spectrum of  
682 Differentiation in Hematopoietic Cells. *Cell Rep.* **14**, 966–977 (2016).
- 683 69. Georgolopoulos, G., Iwata, M., Psatha, N., Yiangou, M. & Vierstra, J. Unbiased phenotypic  
684 identification of functionally distinct hematopoietic progenitors. *J. Biol. Res.* **26**, 4 (2019).
- 685 70. Pronk, C. J. H. *et al.* Elucidation of the phenotypic, functional, and molecular topography of a  
686 myeloerythroid progenitor cell hierarchy. *Cell Stem Cell* **1**, 428–442 (2007).
- 687 71. Giladi, A. *et al.* Single-cell characterization of haematopoietic progenitors and their trajectories in  
688 homeostasis and perturbed haematopoiesis. *Nat. Cell Biol.* **20**, 836–846 (2018).

- 689 72. Upadhaya, S. *et al.* Kinetics of adult hematopoietic stem cell differentiation in vivo. *J. Exp. Med.*  
690 **215**, 2815–2832 (2018).
- 691 73. Cao, J. *et al.* A human cell atlas of fetal gene expression. *Science* **370**, (2020).
- 692 74. Mancini, E. *et al.* FOG-1 and GATA-1 act sequentially to specify definitive megakaryocytic and  
693 erythroid progenitors. *EMBO J.* **31**, 351–365 (2012).
- 694 75. Heuston, E. F. *et al.* Establishment of regulatory elements during erythro-megakaryopoiesis  
695 identifies hematopoietic lineage-commitment points. *Epigenetics & Chromatin* vol. 11 (2018).
- 696 76. Woolthuis, C. M. & Park, C. Y. Hematopoietic stem/progenitor cell commitment to the  
697 megakaryocyte lineage. *Blood* **127**, 1242–1248 (2016).
- 698 77. Sanjuan-Pla, A. *et al.* Platelet-biased stem cells reside at the apex of the haematopoietic stem-cell  
699 hierarchy. *Nature* **502**, 232–236 (2013).
- 700 78. Rodriguez-Fraticelli, A. E. *et al.* Clonal analysis of lineage fate in native haematopoiesis. *Nature*  
701 **553**, 212–216 (2018).
- 702 79. Miyawaki, K. *et al.* Identification of unipotent megakaryocyte progenitors in human hematopoiesis.  
703 *Blood* **129**, 3332–3343 (2017).
- 704 80. Psaila, B. *et al.* Single-cell profiling of human megakaryocyte-erythroid progenitors identifies  
705 distinct megakaryocyte and erythroid differentiation pathways. *Genome Biol.* **17**, 83 (2016).
- 706 81. Sanada, C. *et al.* Adult human megakaryocyte-erythroid progenitors are in the CD34+CD38mid  
707 fraction. *Blood* **128**, 923–933 (2016).
- 708 82. Mori, Y., Chen, J. Y., Pluvinae, J. V., Seita, J. & Weissman, I. L. Prospective isolation of human  
709 erythroid lineage-committed progenitors. *Proc. Natl. Acad. Sci. U. S. A.* **112**, 9638–9643 (2015).
- 710 83. Li, J. *et al.* Isolation and transcriptome analyses of human erythroid progenitors: BFU-E and CFU-E.  
711 *Blood* **124**, 3636–3645 (2014).
- 712 84. Messner, H. A., Jamal, N. & Izaguirre, C. The growth of large megakaryocyte colonies from human  
713 bone marrow. *J. Cell. Physiol. Suppl.* **1**, 45–51 (1982).
- 714 85. Corash, L., Levin, J., Mok, Y., Baker, G. & McDowell, J. Measurement of megakaryocyte frequency  
715 and ploidy distribution in unfractionated murine bone marrow. *Exp. Hematol.* **17**, 278–286 (1989).
- 716 86. Karamitros, D. *et al.* Single-cell analysis reveals the continuum of human lympho-myeloid  
717 progenitor cells. *Nat. Immunol.* **19**, 85–97 (2018).

## Figure 1

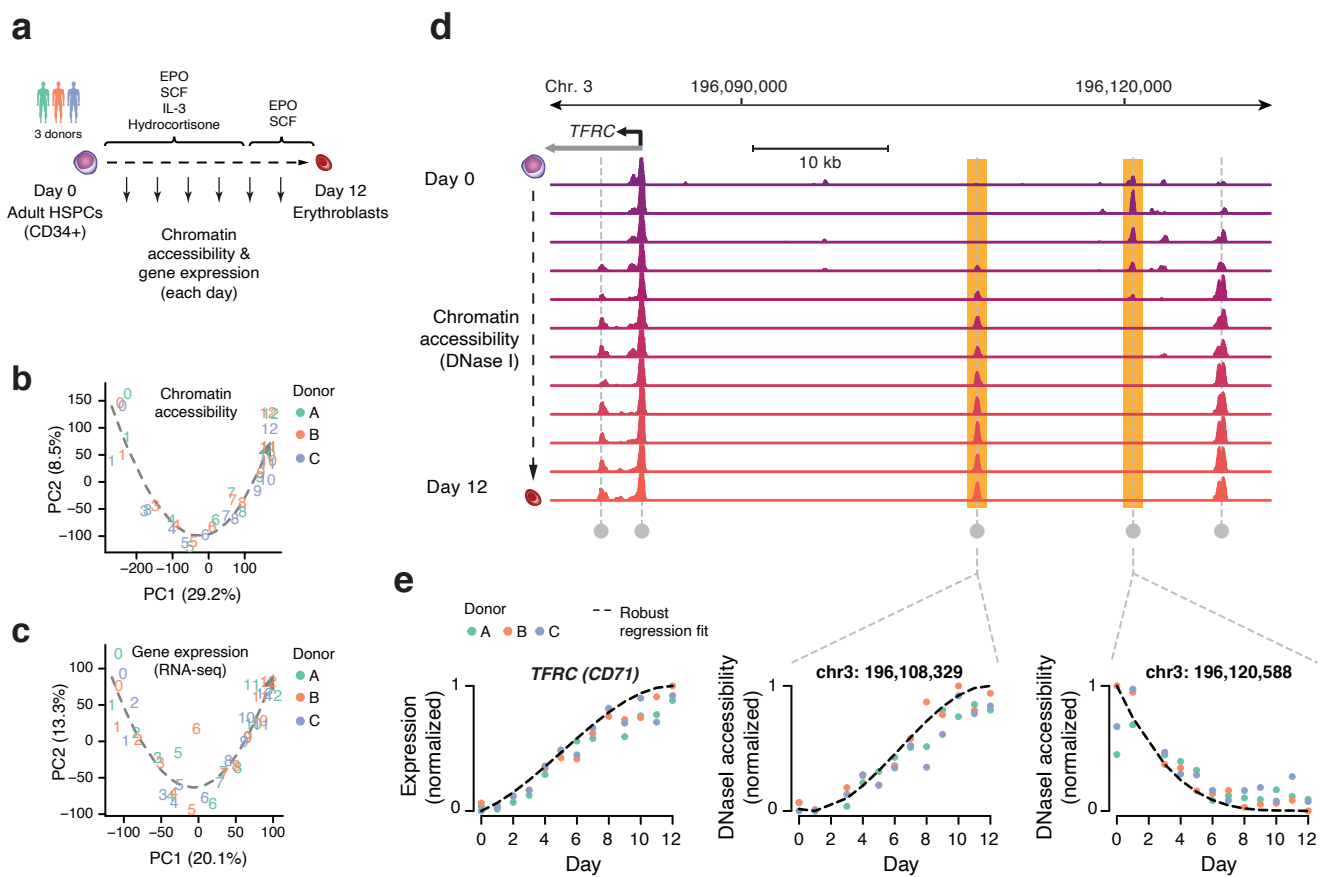

## Figure 2

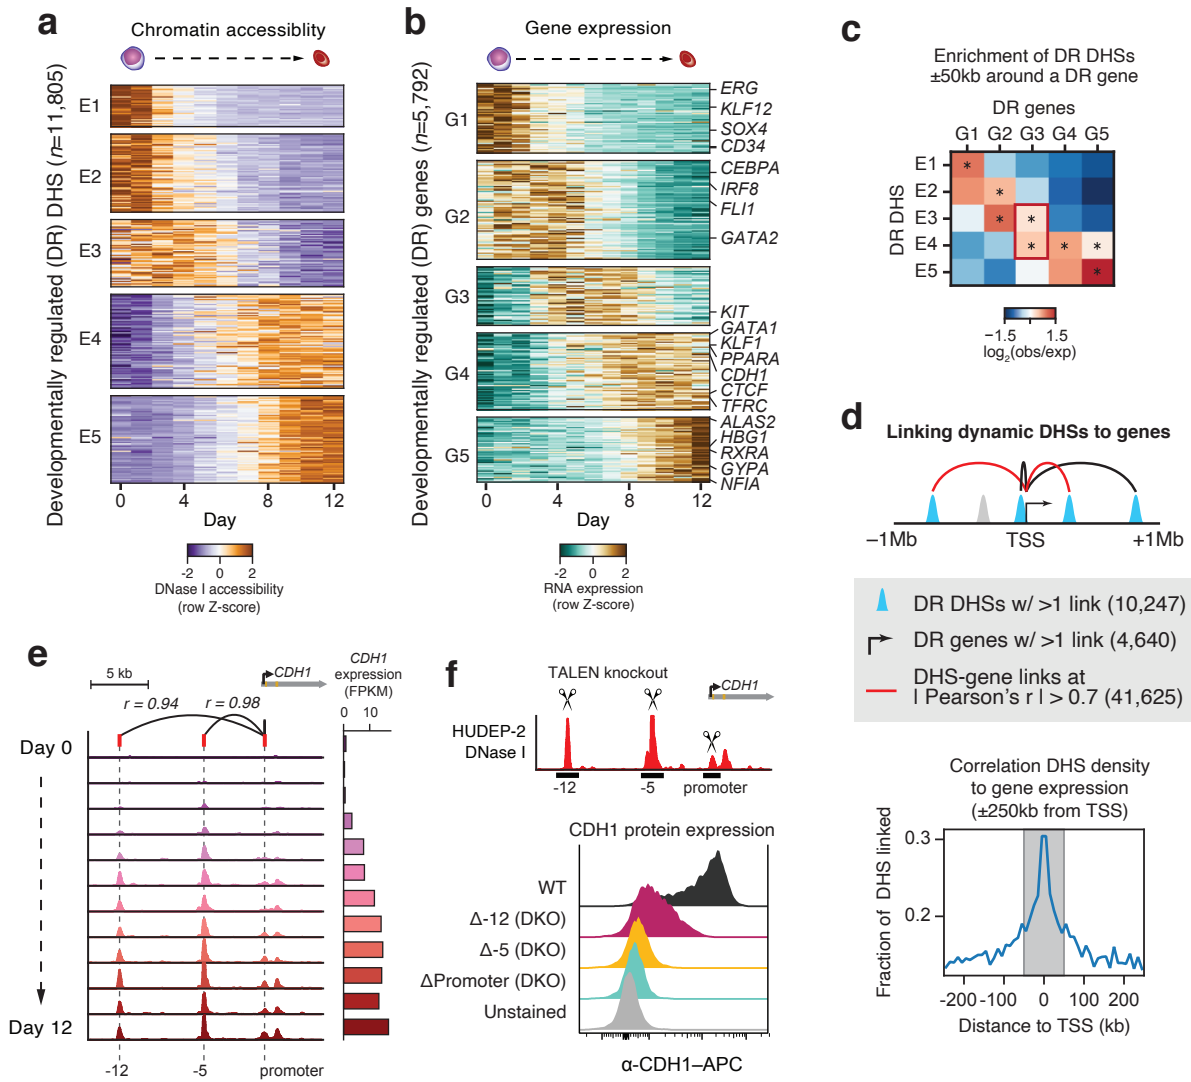

## Figure 3

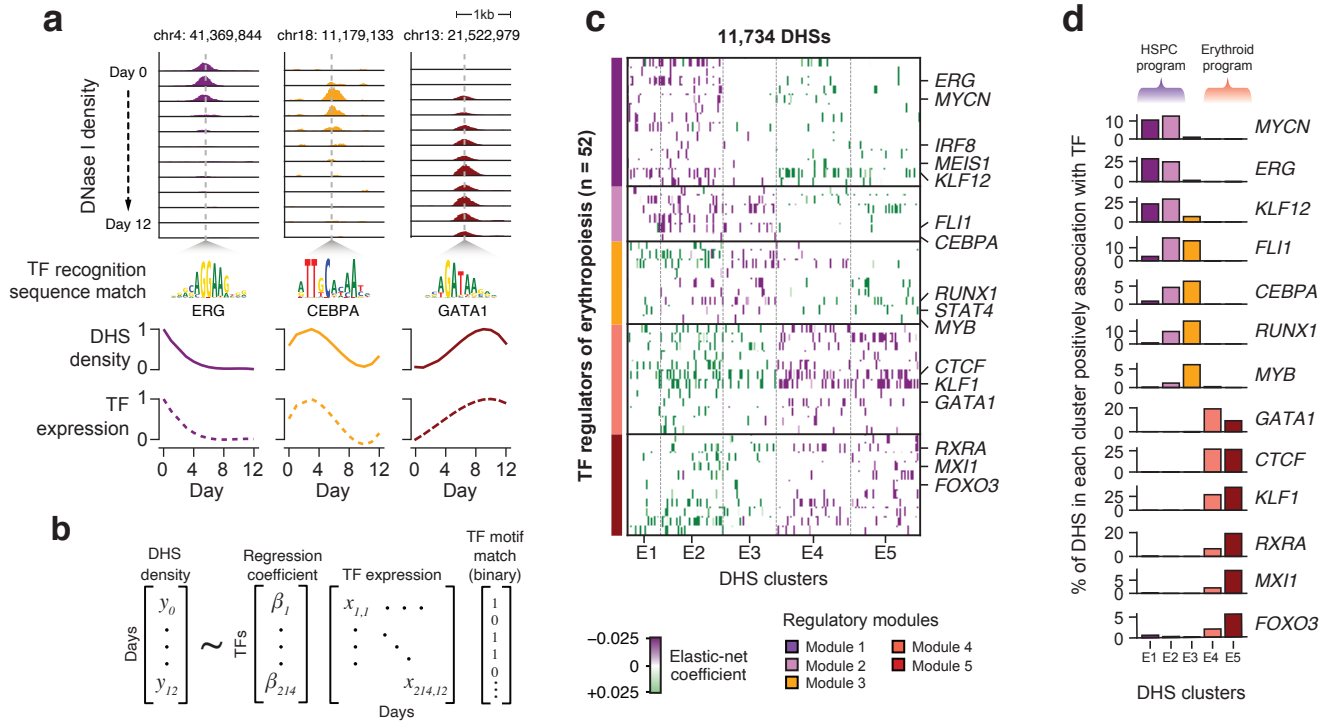



## Figure 4

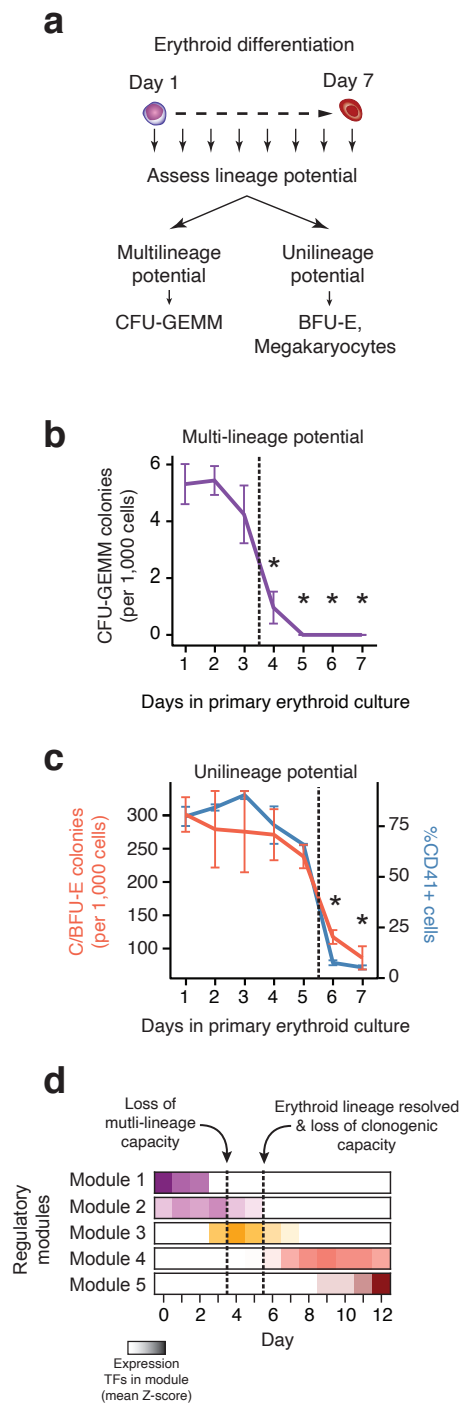

## Figure 5

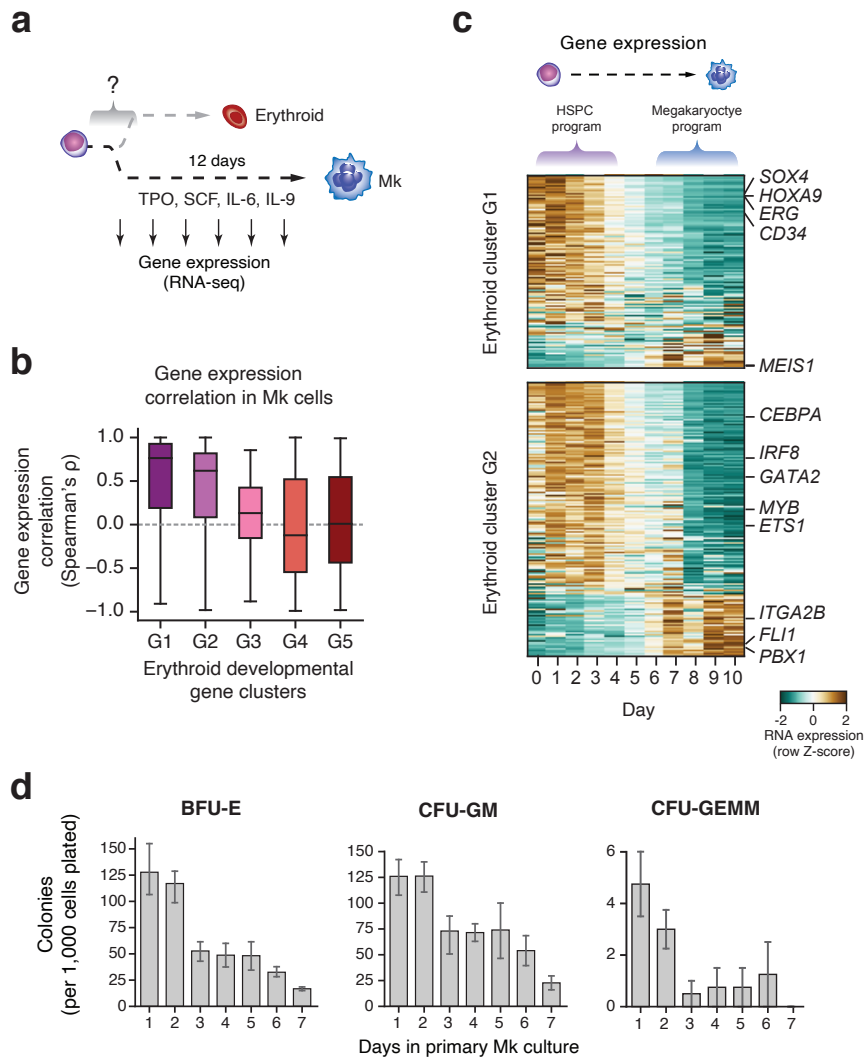

**Figure 6**

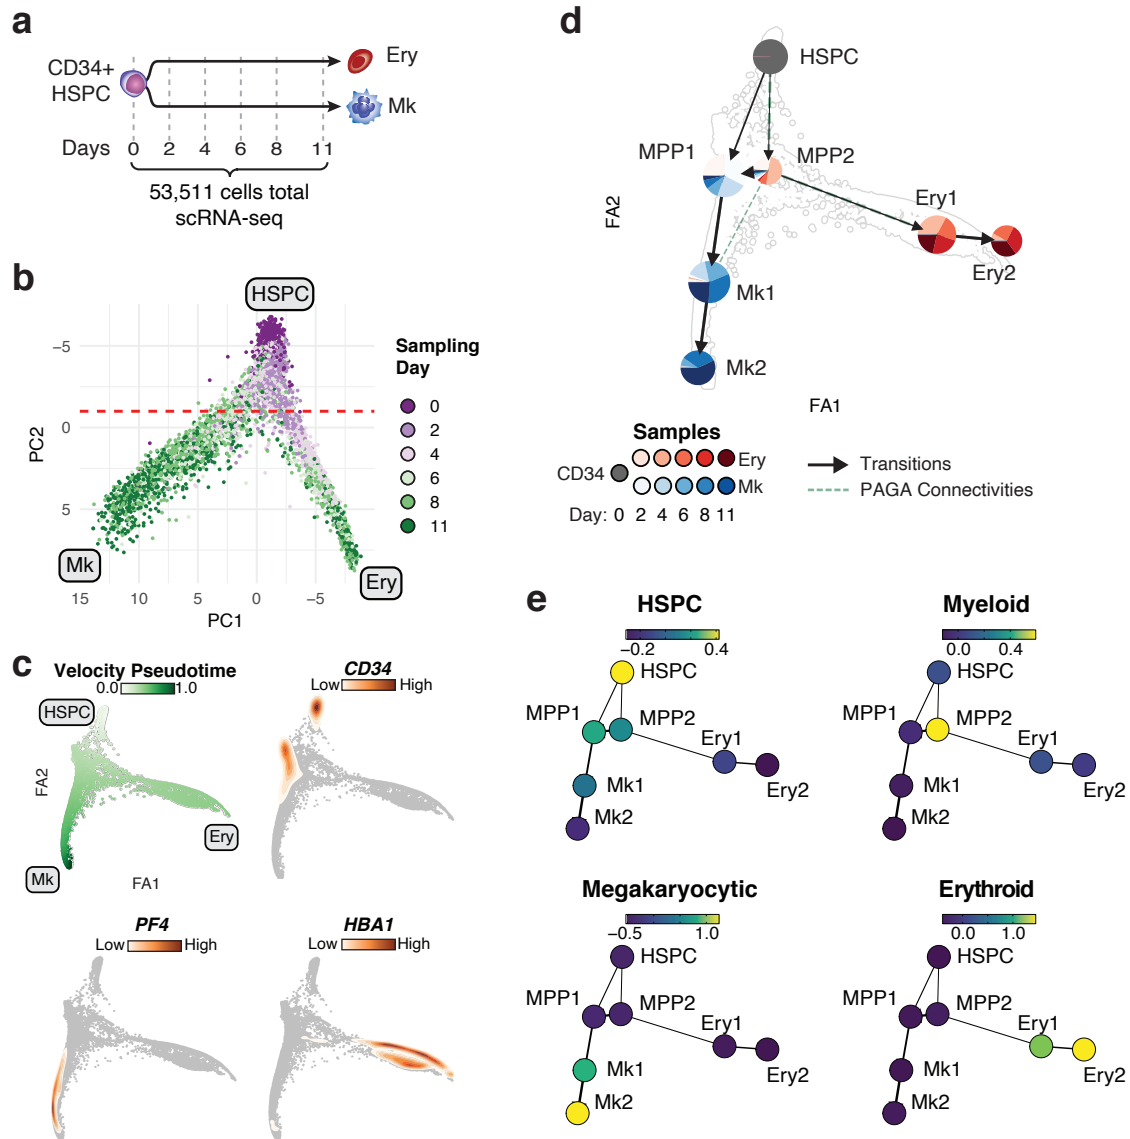

## Figure 7

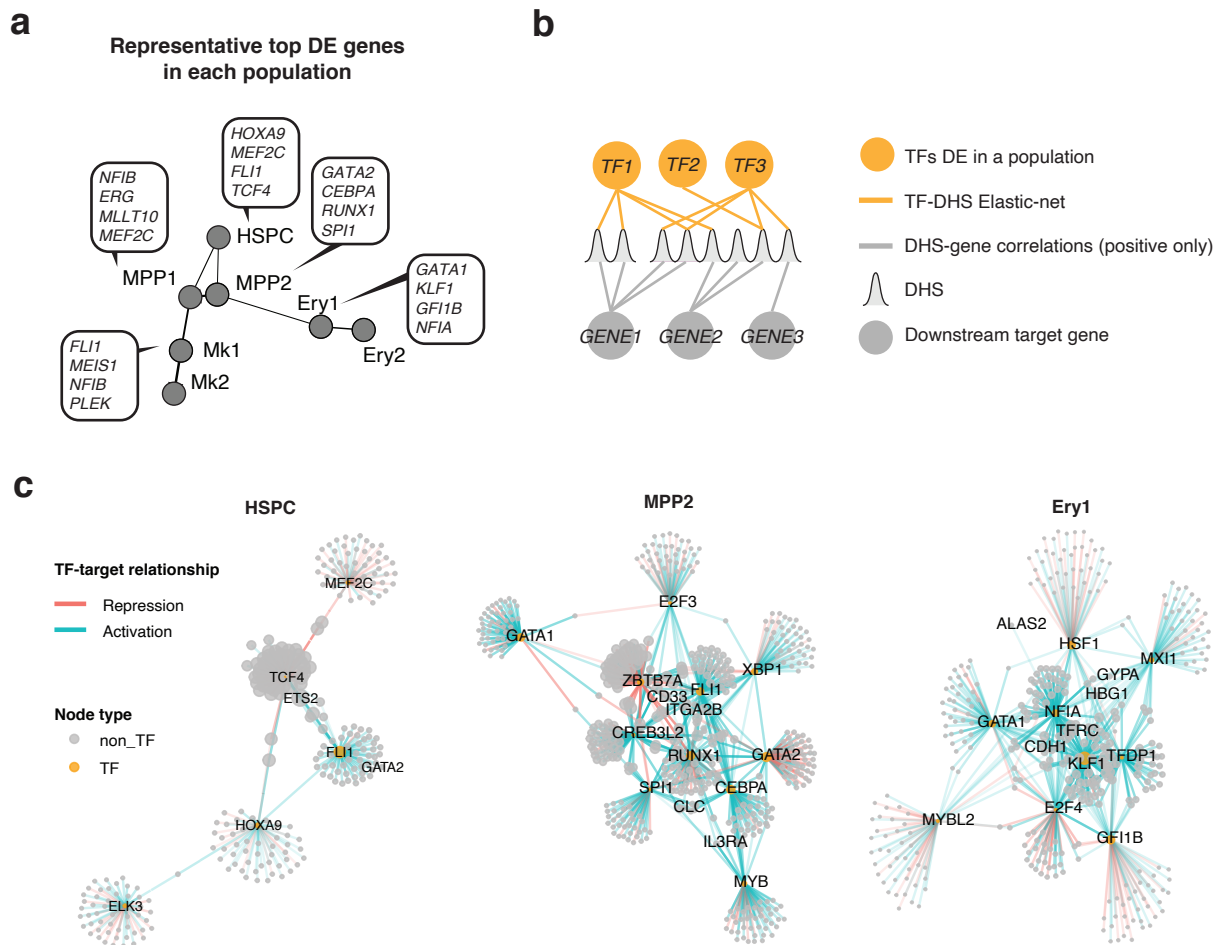

Source: https://www.biorxiv.org/content/10.1101/2020.04.02.022566v4.full.pdf
